# Supplementary material for: Novel Ni–Ge–P anodes for lithium-ion batteries with enhanced reversibility and reduced redox potential
Source: Royal Society of Chemistry journal article supplement (doi:10.1039/d2qi01973f), 2022-12-03
Supplement: d2qi01973f1.pdf [file d2qi01973f1.pdf]

## Supporting Information

### Novel Ni–Ge–P anodes for lithium-ion batteries with enhanced reversibility and reduced redox potential

Guoping Liu,<sup>a</sup> Nan Wang,<sup>b</sup> Fangya Qi,<sup>a</sup> Xiaoyi Lu,<sup>a</sup> Yaohua Liang,<sup>c</sup> and Zhipeng Sun\*<sup>a</sup>

<sup>a</sup> School of Materials and Energy, Guangdong University of Technology, Guangzhou 510006, China

<sup>b</sup> School of Materials & Energy, Lanzhou University, Gansu 730000, China

<sup>c</sup> Department of Agricultural and Biosystems Engineering, South Dakota State University, Brookings, South Dakota 57007, United States

\* Corresponding author

Zhipeng Sun: [zpsunxj@gdut.edu.cn](mailto:zpsunxj@gdut.edu.cn)

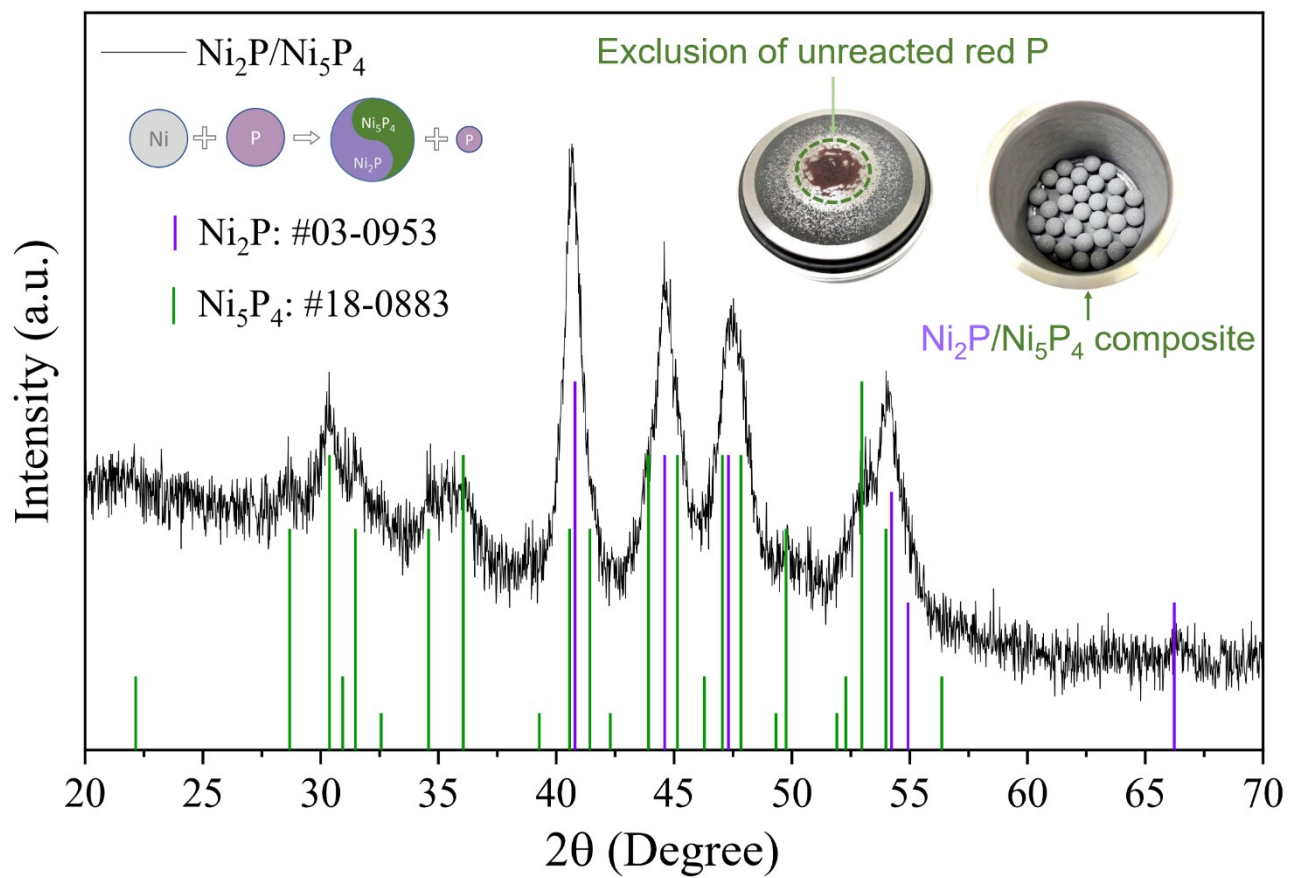

**Fig. S1.** The XRD result and the digital photo of the 14 h high-energy ball-milled Ni:P (1:1) mixed powder.

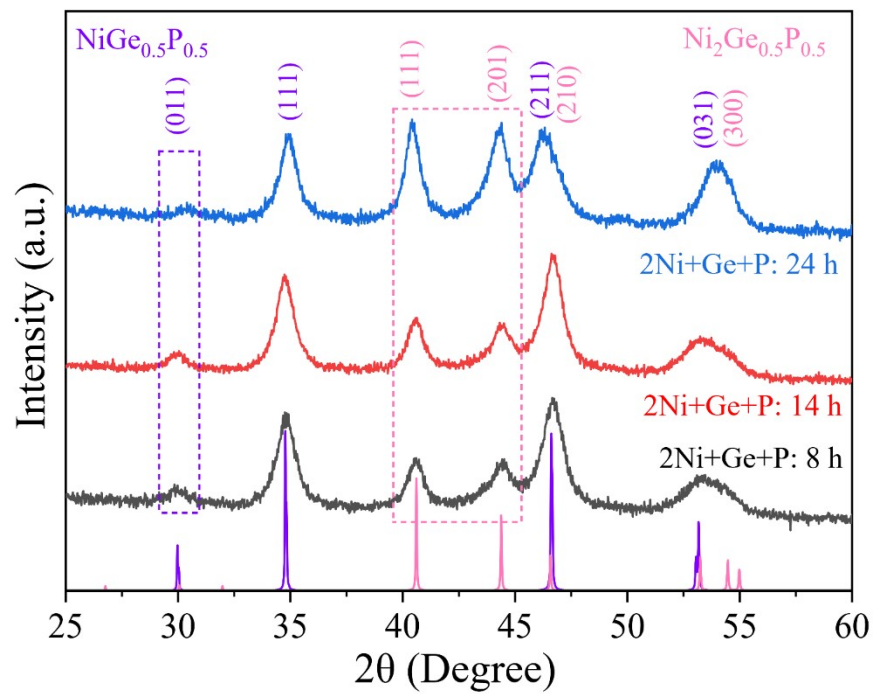

**Fig. S2.** The XRD pattern evolution of the ball-milled Ni: Ge: P (2: 1: 1) mixed powder after milling 8, 14, and 24 h.

**Table S1.** Structure parameters for Ni<sub>2</sub>GeP/Ni<sub>6</sub>Ge<sub>2</sub>P as determined by Rietveld refinement of powder XRD data at room temperature.

NiGe<sub>0.5</sub>P<sub>0.5</sub>:

| Atom | Wyckoff site | <i>x/a</i> | <i>y/b</i> | <i>z/c</i> | Occupancy |
|------|--------------|------------|------------|------------|-----------|
| Ni   | 4a           | 0          | 0          | 0          | 1         |
| Ge   | 4c           | 0.75       | 0.310      | 0          | 0.5       |
| P    | 4c           | 0.75       | 0.310      | 0          | 0.5       |

Space group: Amam (63); *a* = 5.1288 Å, *b* = 5.9995 Å, *c* = 3.4286 Å,  $\alpha = \beta = \gamma = 90^\circ$ , wt.% = 65.56%.

Ni<sub>2</sub>Ge<sub>0.5</sub>P<sub>0.5</sub>:

| Atom | Wyckoff site | <i>x/a</i> | <i>y/b</i> | <i>z/c</i> | Occupancy |
|------|--------------|------------|------------|------------|-----------|
| Ni1  | 3f           | 0.2580     | 0          | 0          | 1         |
| Ni2  | 3g           | 0.5886     | 0          | 0.5        | 1         |
| Ge1  | 1b           | 0          | 0          | 0.5        | 0.5       |
| P1   | 1b           | 0          | 0          | 0.5        | 0.5       |
| Ge2  | 2c           | 0.3333     | 0.6667     | 0          | 0.5       |
| P2   | 2c           | 0.3333     | 0.6667     | 0          | 0.5       |

Space group: P-62m (189); *a* = *b* = 5.9077 Å, *c* = 3.3656 Å,  $\alpha = \beta = 90^\circ$ ,  $\gamma = 120^\circ$ , wt.% = 34.44%.

**Table S2.** Structure parameters for Ni<sub>2</sub>P as determined by Rietveld refinement of powder XRD data at room temperature.

| Atom | Wyckoff site | <i>x/a</i> | <i>y/b</i> | <i>z/c</i> | Occupancy |
|------|--------------|------------|------------|------------|-----------|
| Ni1  | 3e           | 0.2575     | 0          | 0          | 1         |
| Ni2  | 3f           | 0.5957     | 0          | 0.5        | 1         |
| P1   | 1b           | 0          | 0          | 0.5        | 1         |
| P2   | 2d           | 0.3333     | 0.6667     | 0          | 1         |

Space group: P321 (150); *a* = *b* = 5.8923 Å, *c* = 3.3478 Å,  $\alpha = \beta = 90^\circ$ ,  $\gamma = 120^\circ$ .

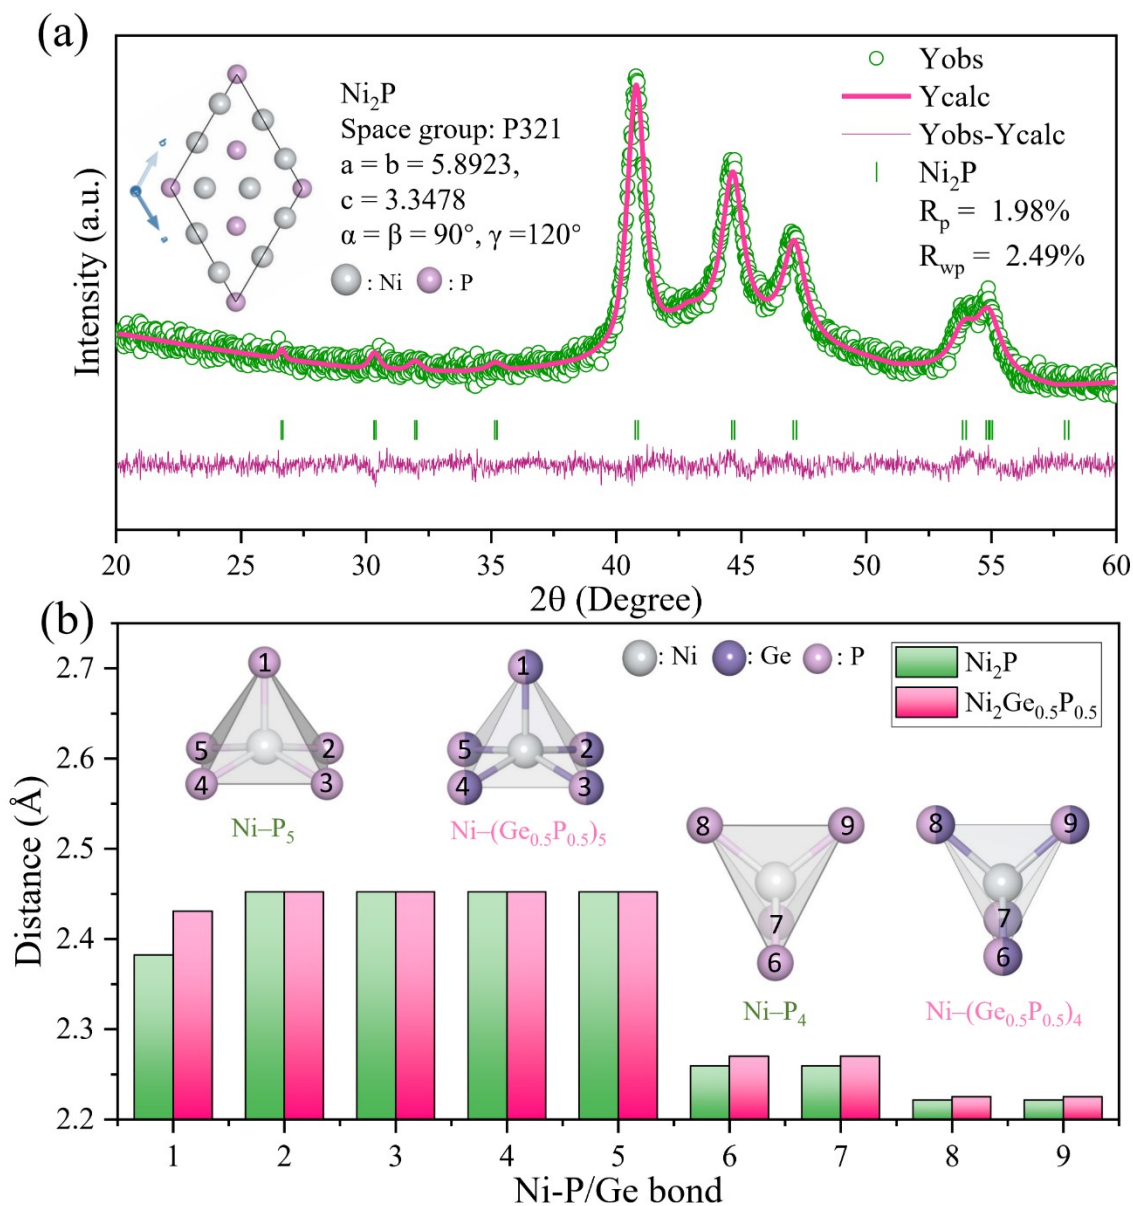

**Fig. S3.** (a) XRD refinement result of the  $\text{Ni}_2\text{P}$ . (b) The bond length of Ni-P/Ge in Ni-P<sub>5</sub>, Ni-(Ge<sub>0.5</sub>P<sub>0.5</sub>)<sub>5</sub>, Ni-P<sub>4</sub>, and Ni-(Ge<sub>0.5</sub>P<sub>0.5</sub>)<sub>4</sub> polyhedron.

**Table S3.** Crystal structure parameters of NiP, NiGe<sub>0.5</sub>P<sub>0.5</sub>, Ni<sub>2</sub>P, and Ni<sub>2</sub>Ge<sub>0.5</sub>P<sub>0.5</sub>.

| Phases                                             | Space group | a (Å)  | b (Å)  | c (Å)  | $\alpha$ | $\beta$ | $\gamma$ | Volume (Å <sup>3</sup> ) | Volume/Atom (Å <sup>3</sup> ) |
|----------------------------------------------------|-------------|--------|--------|--------|----------|---------|----------|--------------------------|-------------------------------|
| NiP                                                | Pbca        | 6.0500 | 4.8819 | 6.8900 | 90°      | 90°     | 90°      | 203.5                    | 12.7                          |
| NiGe <sub>0.5</sub> P <sub>0.5</sub>               | Amam        | 5.1288 | 5.9995 | 3.4286 | 90°      | 90°     | 90°      | 105.5                    | 13.2                          |
| Ni <sub>2</sub> P                                  | P321        | 5.8923 | 5.8923 | 3.3478 | 90°      | 90°     | 120°     | 100.7                    | 11.2                          |
| Ni <sub>2</sub> Ge <sub>0.5</sub> P <sub>0.5</sub> | P-62m       | 5.9077 | 5.9077 | 3.3656 | 90°      | 90°     | 120°     | 101.7                    | 11.3                          |

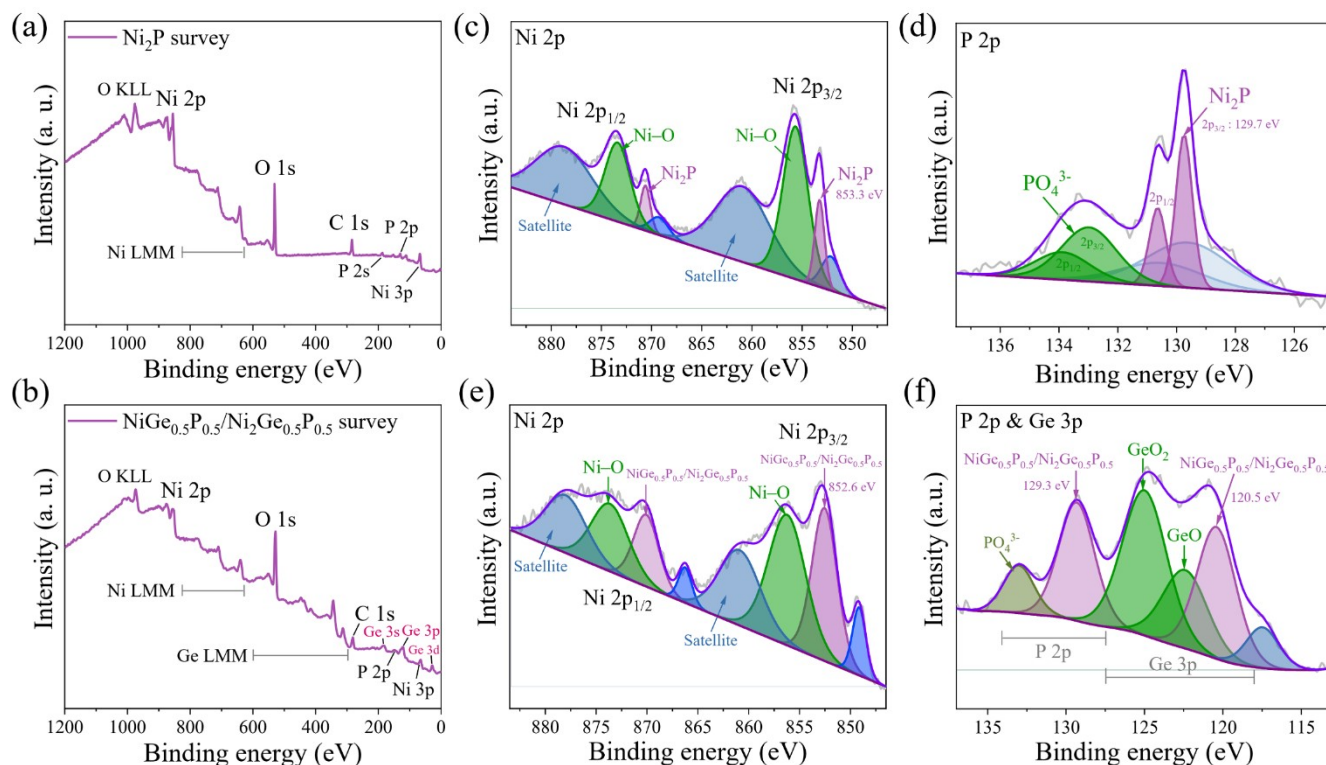**Fig. S4.** Full XPS spectra of (a) Ni<sub>2</sub>P and (b) NiGe<sub>0.5</sub>P<sub>0.5</sub>/Ni<sub>2</sub>Ge<sub>0.5</sub>P<sub>0.5</sub>. (c) Ni 2p and (d) P 2p high-resolution XPS spectra of Ni<sub>2</sub>P. (e) Ni 2p and (f) P 2p, Ge 3p high-resolution XPS spectra of NiGe<sub>0.5</sub>P<sub>0.5</sub>/Ni<sub>2</sub>Ge<sub>0.5</sub>P<sub>0.5</sub>.

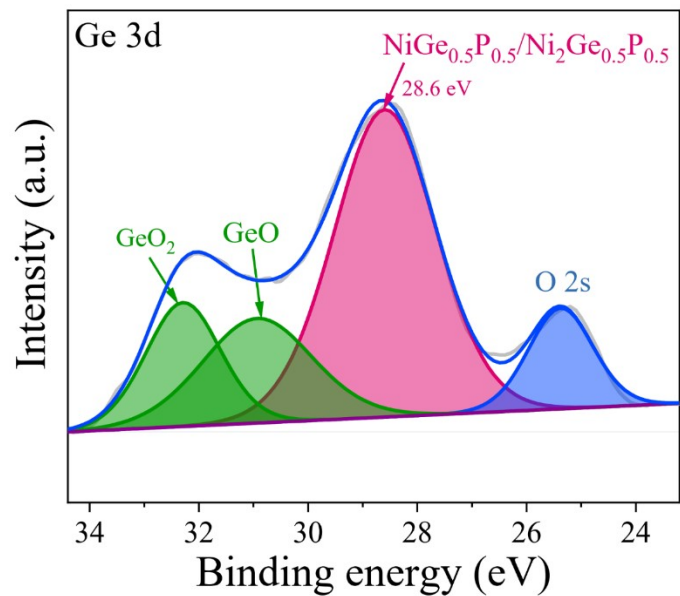

**Fig. S5.** The Ge 3d high-resolution XPS spectrum of  $\text{Ni}_2\text{Gep}/\text{Ni}_6\text{Ge}_2\text{P}$ .

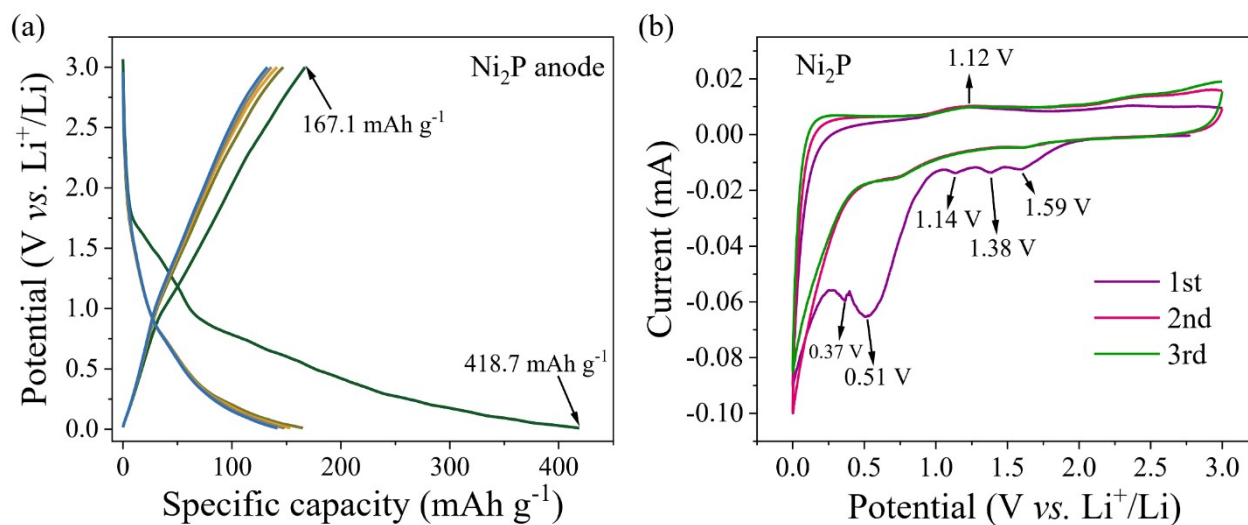

**Fig. S6.** Galvanostatic charge–discharge curves of  $\text{Ni}_2\text{P}$  composite at  $50 \text{ mA g}^{-1}$  using  $1 \text{ M LiPF}_6$  in EC: DMC (1:1 by Vol% with 5% FEC) as the electrolyte. (b) Cyclic voltammetry curves of the first three cycles of  $\text{Ni}_2\text{P}$  anode at  $0.1 \text{ mV s}^{-1}$ .



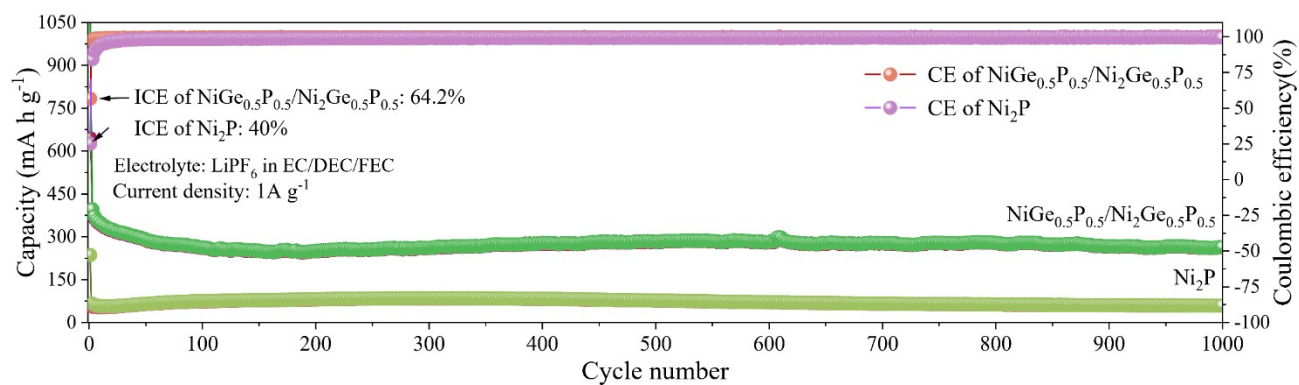

**Fig. S7.** cycle performance of the Ni<sub>2</sub>P and NiGe<sub>0.5</sub>P<sub>0.5</sub>/Ni<sub>2</sub>Ge<sub>0.5</sub>P<sub>0.5</sub> anode at a current of 1 A g<sup>-1</sup>.

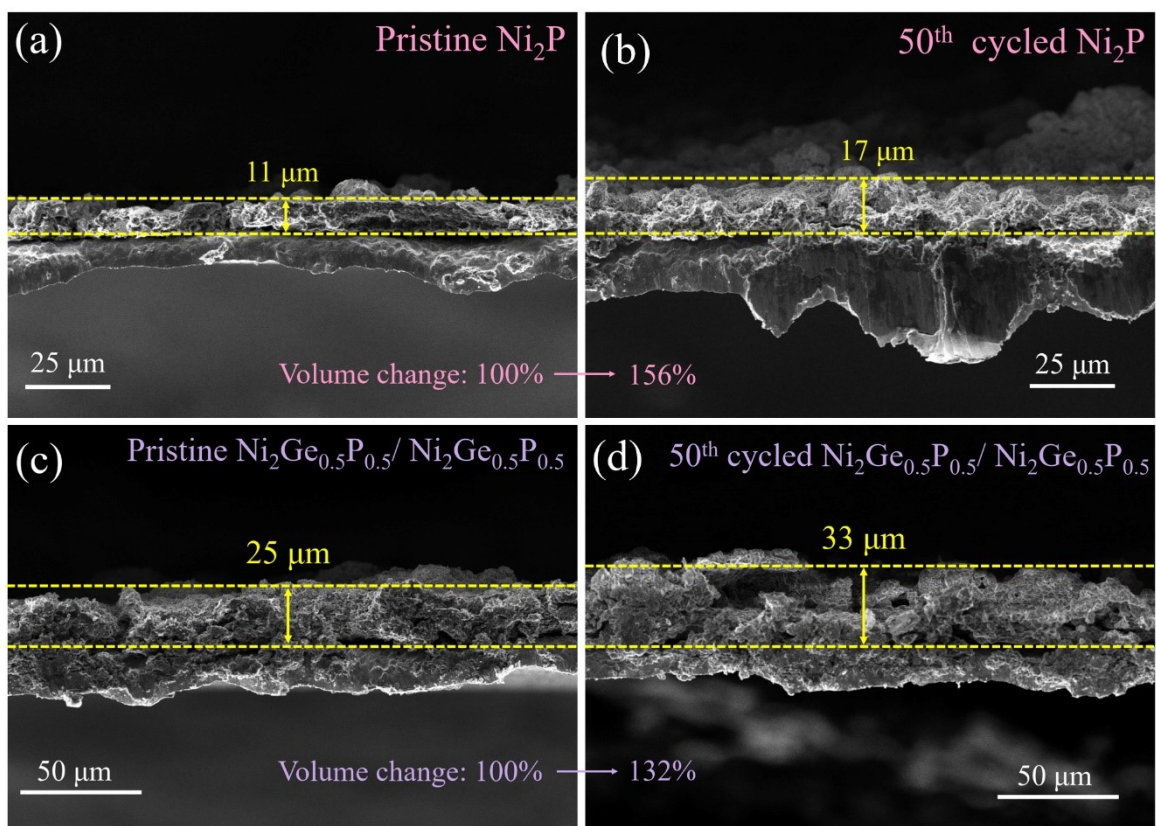

**Fig. S8.** Cross-sectional SEM images of the (a) Ni<sub>2</sub>P electrode, (b) 50<sup>th</sup> cycled Ni<sub>2</sub>P electrode, (c) NiGe<sub>0.5</sub>P<sub>0.5</sub>/Ni<sub>2</sub>Ge<sub>0.5</sub>P<sub>0.5</sub> electrode, and (d) 50<sup>th</sup> NiGe<sub>0.5</sub>P<sub>0.5</sub>/Ni<sub>2</sub>Ge<sub>0.5</sub>P<sub>0.5</sub> cycled electrode.



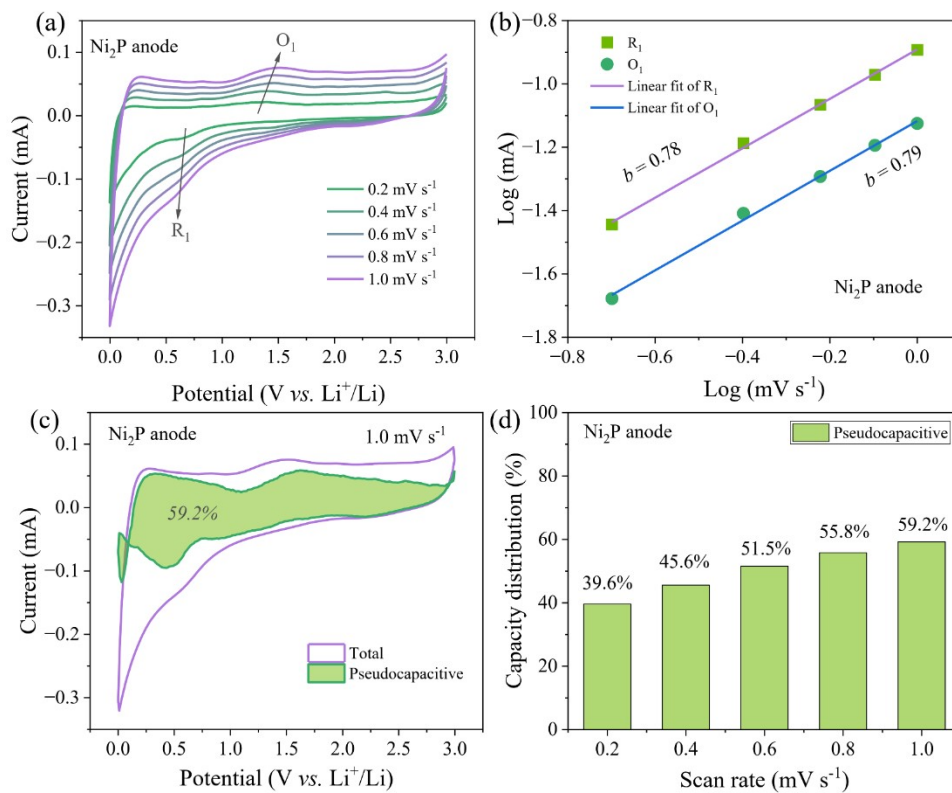

**Fig. S9.** (a) CV curves at different scan rates of Ni<sub>2</sub>P. (b) The corresponding log(*i*) vs log(*v*) plots. (c) CV curve with pseudocapacitive contribution at 1.0 mV s<sup>-1</sup> (d) Normalized ratio of pseudocapacitive and diffusion-controlled contribution at different scan rates.

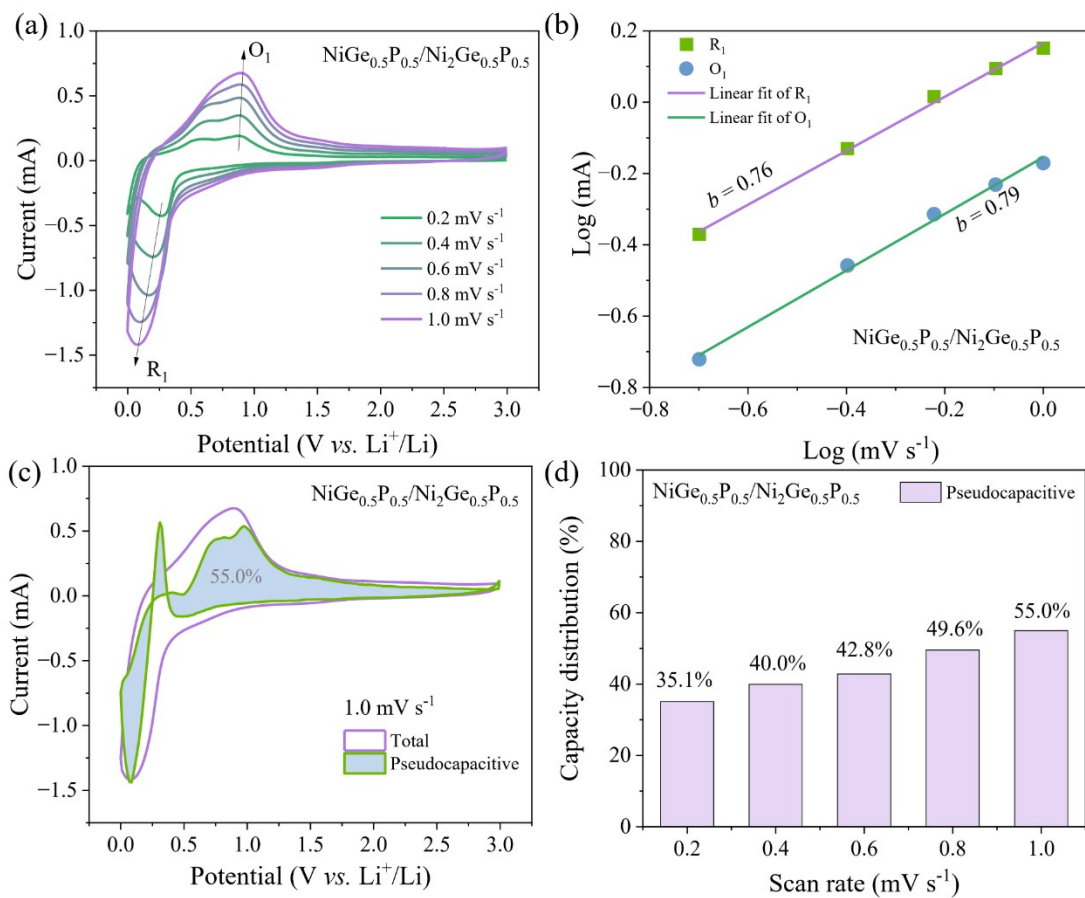

**Fig. S10.** (a) CV curves at different scan rates of  $\text{NiGe}_{0.5}\text{P}_{0.5}/\text{Ni}_2\text{Ge}_{0.5}\text{P}_{0.5}$ . (b) The corresponding  $\log(i)$  vs  $\log(v)$  plots. (c) CV curve with pseudocapacitive contribution at 1.0  $\text{mV s}^{-1}$  (d) Normalized ratio of pseudocapacitive and diffusion-controlled contribution at different scan rates.

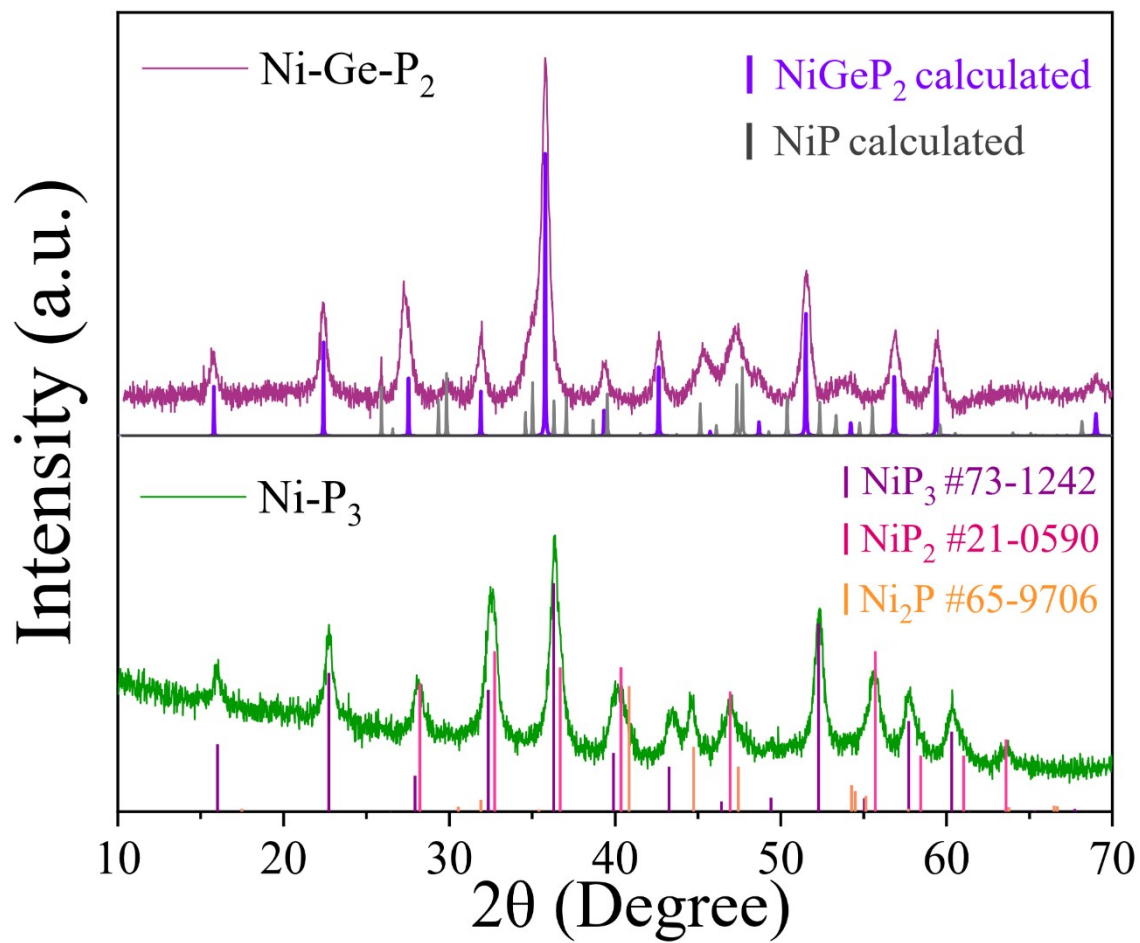

Fig. S11. XRD results of ball milled Ni-P<sub>3</sub> and Ni-Ge-P<sub>2</sub>.

**Table S4.** Structure parameters for NiGeP<sub>2</sub> and NiP as determined by Rietveld refinement of powder XRD data at room temperature.

NiGeP<sub>2</sub>:

| Atom | Wyckoff site | $x/a$   | $y/b$   | $z/c$ | Occupancy |
|------|--------------|---------|---------|-------|-----------|
| Ni   | 8c           | 0.25    | 0.25    | 0     | 1         |
| Ge   | 24g          | 0.34218 | 0.13511 | 0     | 0.3333    |
| P    | 24g          | 0.34218 | 0.13511 | 0     | 0.6667    |

Space group: Im-3 (204);  $a = b = c = 7.9284 \text{ \AA}$ ,  $\alpha = \beta = \gamma = 90^\circ$ , wt.% = 78.13%.

NiP:

| Atom | Wyckoff site | $x/a$   | $y/b$   | $z/c$   | Occupancy |
|------|--------------|---------|---------|---------|-----------|
| Ni   | 8c           | 0.04077 | 0.57306 | 0.20326 | 1         |
| P    | 8c           | 0.2406  | 0.62704 | 0.57452 | 1         |

Space group: P-62m (189);  $a = 4.9446$ ,  $b = 6.8736 \text{ \AA}$ ,  $c = 6.0831 \text{ \AA}$ ,  $\alpha = \beta = \gamma = 90^\circ$ , wt.% = 21.87%.

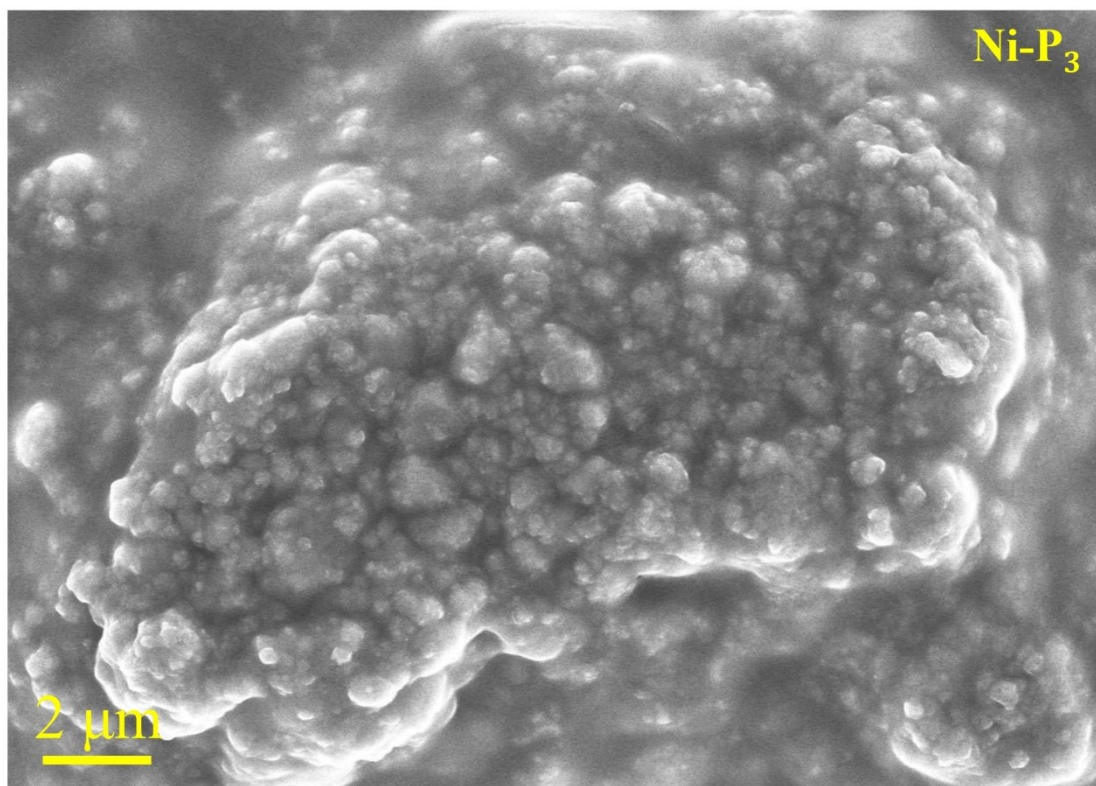

**Fig. S12.** SEM image of the ball-milled Ni-P<sub>3</sub>

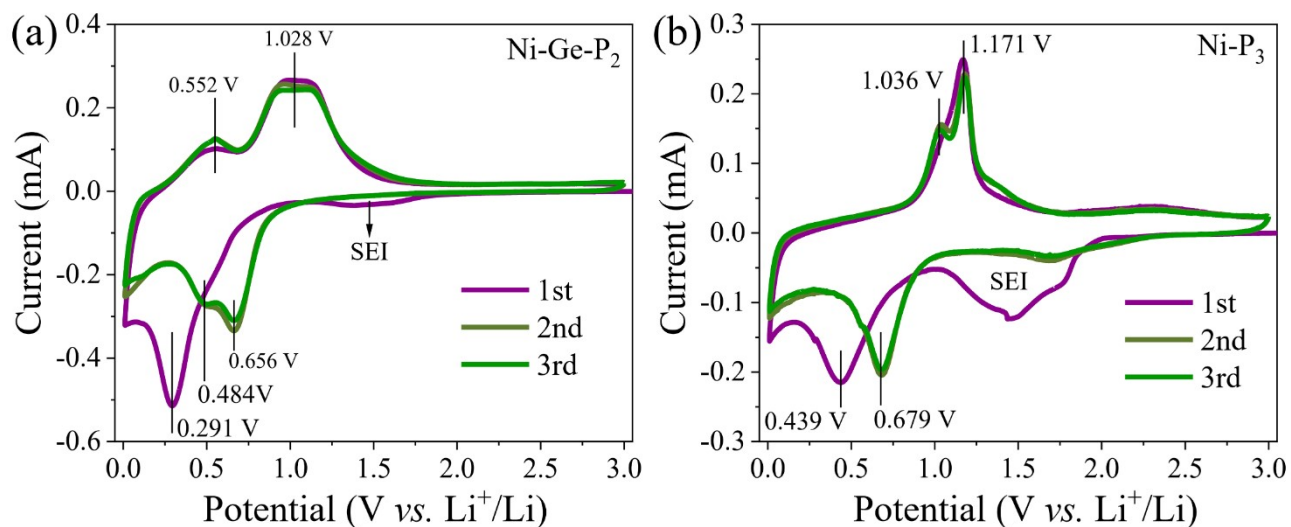

**Fig. S13.** Cyclic voltammetry curves of the first three cycles of (a) Ni-Ge-P<sub>2</sub> and (b) Ni-P<sub>3</sub> anode at 0.1 mV s<sup>-1</sup>.

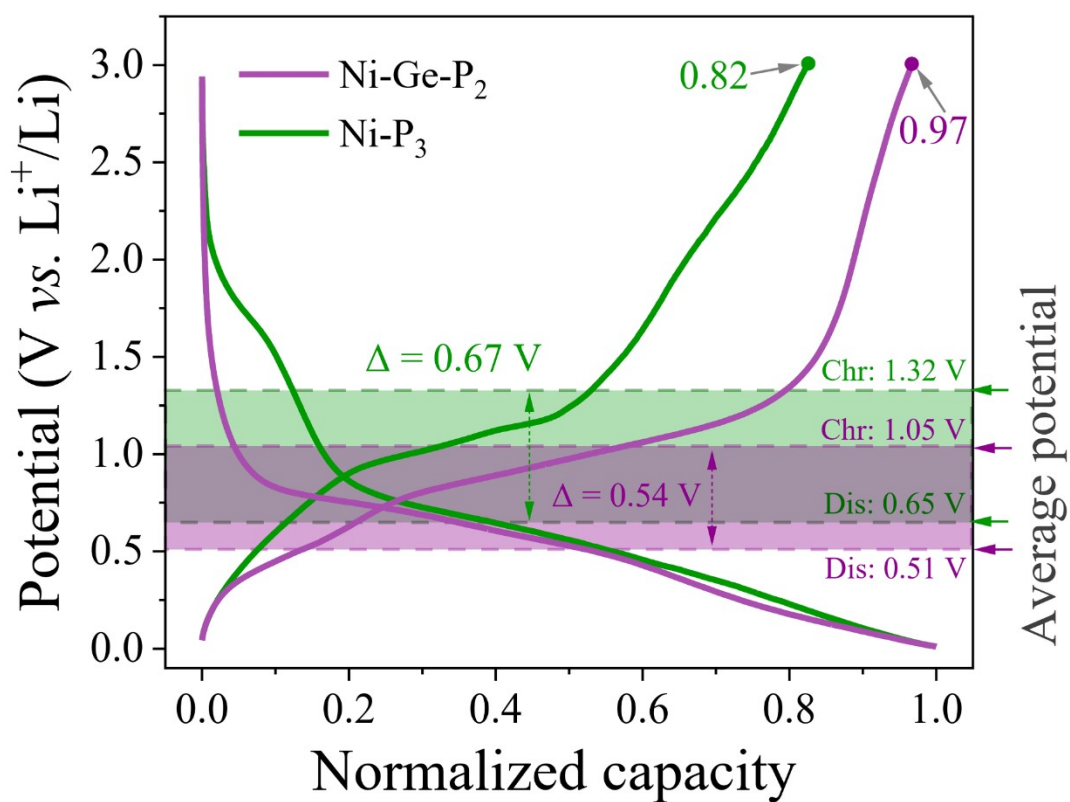

**Fig. S14.** Normalized charge-discharge curve comparison of the Ni-P<sub>3</sub> vs. Ni-Ge-P<sub>2</sub> at third cycle with average discharge/charge potential and polarization gap.

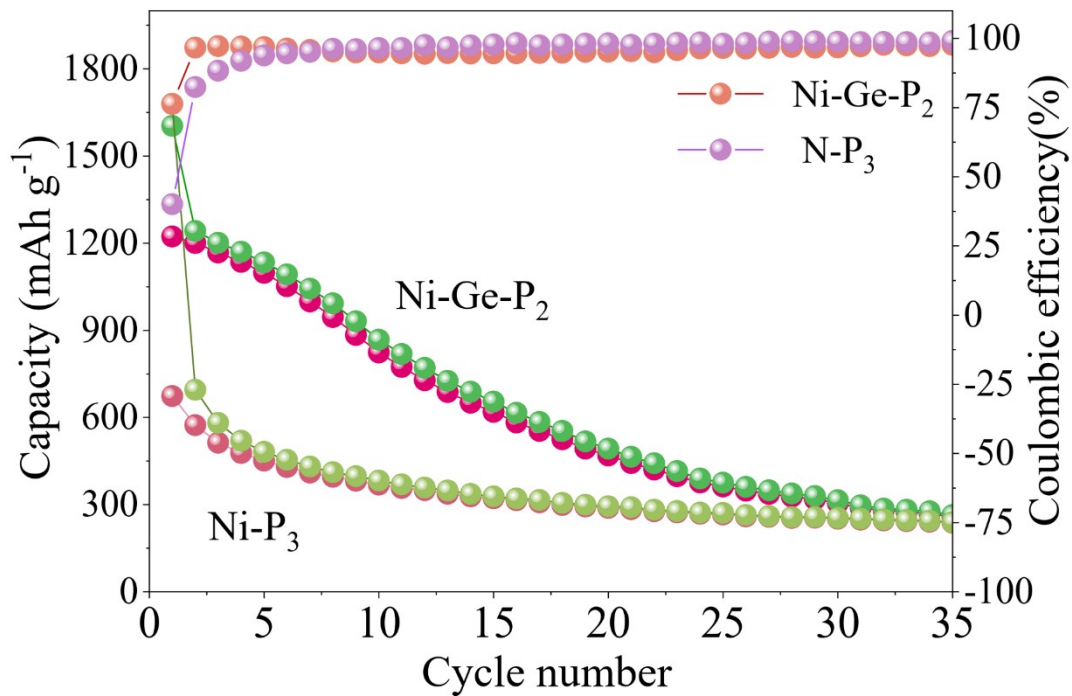

Fig. S15. Cycle performance of the Ni-Ge-P<sub>2</sub> and Ni-P<sub>3</sub> anode at a current density of 50 mA g<sup>-1</sup>.

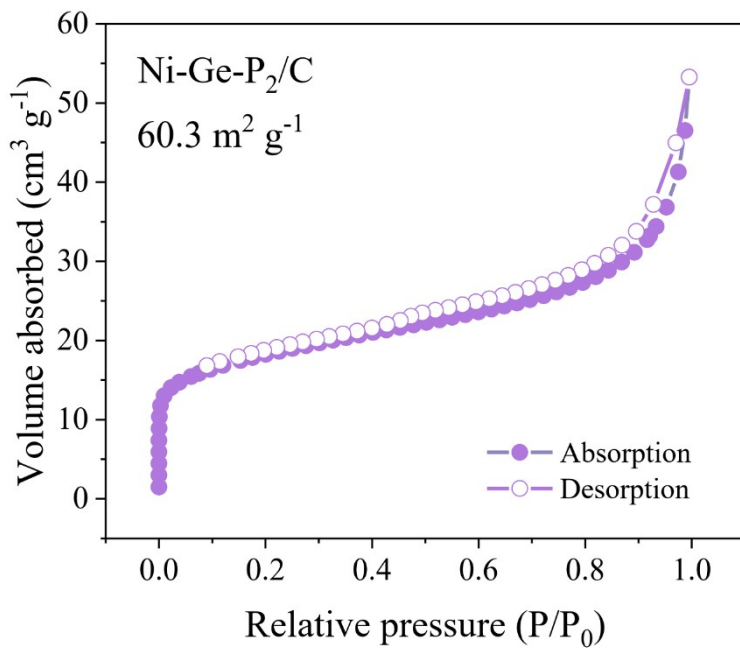

Fig. S16. BET-N<sub>2</sub> adsorption/desorption isotherm of Ni-Ge-P<sub>2</sub>/C.



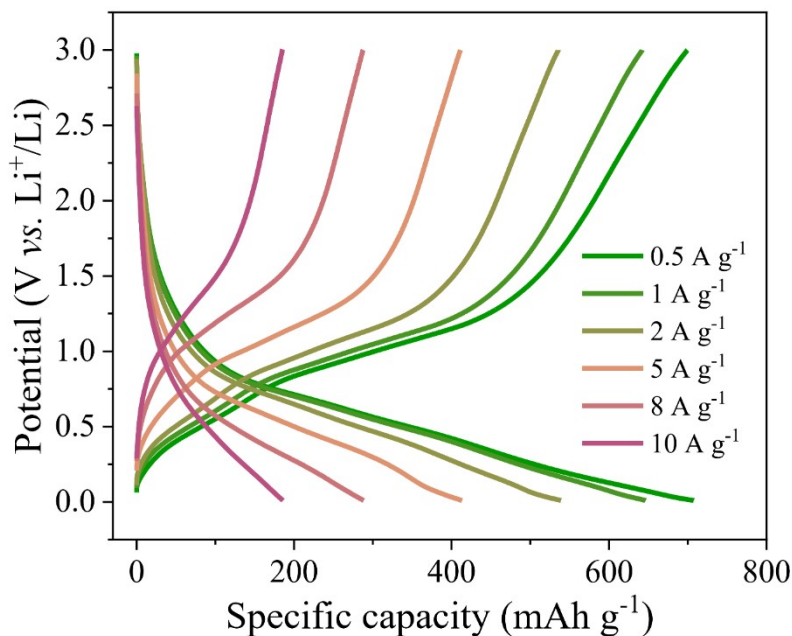

Fig. S17. Discharge-charge curves of the Ni-Ge-P<sub>2</sub>/C at 0.5–10 A g<sup>-1</sup>.

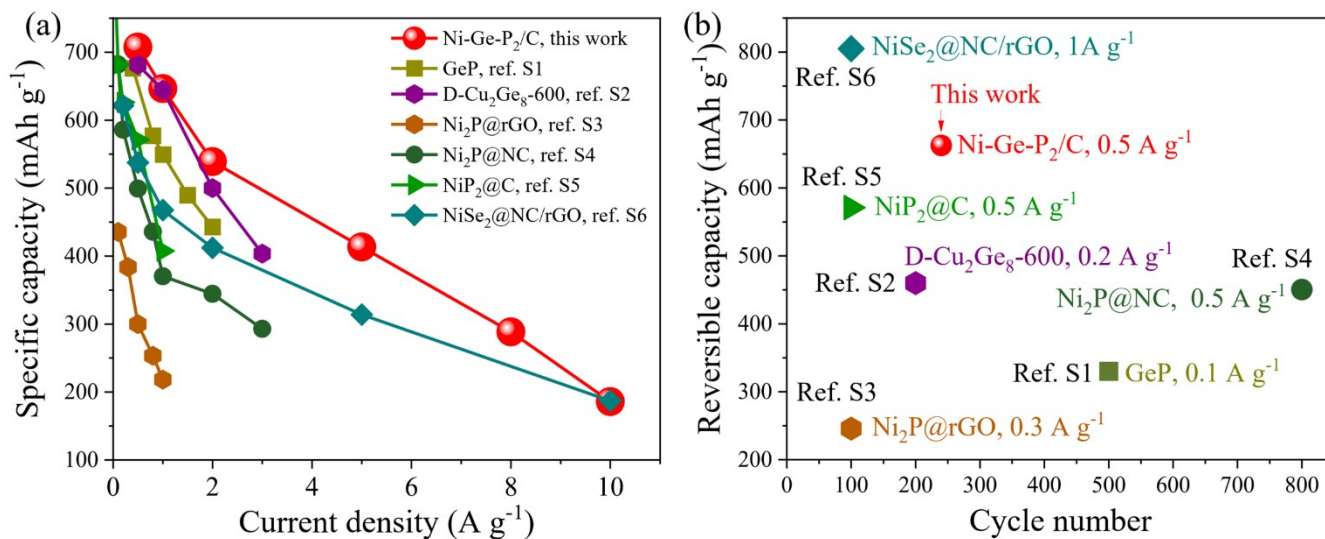

Fig. S18. (a) Rate and (b) cycling performance comparison of the Ni-Ge-P<sub>2</sub>/C and previously reported Ni-, Ge-, and P-based anode.<sup>1-6</sup>



## References

1. Y. Wei, X. Liu, Y. Zhang, R. Yao, T. Zhai and H. Li, Synthesis and Fast Exfoliation of Layered GeP Nanosheets for Advanced Li-Ion Batteries, *ACS Appl. Energy Mater.*, 2022, DOI: 10.1021/acsaem.2c03214.
2. Z. Zhang, K. Sun, Y. Chen, H. Yang, G. Xie, Z. Yu, M. Zhang, Y. Zhang, W. Li, S. Chou and Y. Jiang, High Conductivity Cu<sub>3</sub>Ge and High-Capacity GeO<sub>2</sub> Synergistically Enhance a Continuous Channel Ge-Based Anode for Lithium-Ion Batteries with Long-Life and Scalable Preparation, *Energy & Fuels*, 2022, **36**, 13390-13397.
3. G. Cai, Z. Wu, T. Luo, Y. Zhong, X. Guo, Z. Zhang, X. Wang and B. Zhong, 3D hierarchical rose-like Ni<sub>2</sub>P@rGO assembled from interconnected nanoflakes as anode for lithium ion batteries, *RSC Adv.*, 2020, **10**, 3936-3945.
4. S. Tao, P. Cui, S. Cong, S. Chen, D. Wu, B. Qian, L. Song and A. Marcelli, Metal-organic framework-derived Ni<sub>2</sub>P/nitrogen-doped carbon porous spheres for enhanced lithium storage, *Sci. China Mater.*, 2020, **63**, 1672-1682.
5. G. Li, H. Yang, F. Li, J. Du, W. Shi and P. Cheng, Facile formation of a nanostructured NiP<sub>2</sub>@C material for advanced lithium-ion battery anode using adsorption property of metal-organic framework, *J. Mater. Chem.*, 2016, **4**, 9593-9599.
6. Q. Liu, B. Chen, W. Liang, Y. Xu, G. Li, L. Shao, X. Shi and Z. Sun, Multi-heteroatom-Doped Carbon Matrix and N-Doped Carbon Shell Double Protection Enabled Superb Stability of Nickel Diselenide for Lithium Storage, *ACS Appl. Energy Mater.*, 2022, DOI: 10.1021/acsaem.2c03051.
